# Supplementary material for: Expression and epigenomic landscape of the sex chromosomes in mouse post-meiotic male germ cells
Source: Springer Nature journal article supplement (doi:10.1186/s13072-016-0099-8), 2016-10-27
Supplement: MOESM1 [file 13072_2016_99_MOESM1_ESM.pdf]

| coverage per chromosome (normalized to chromosome length) |                     |                     |                       |                       |                     |                     |                       |                     |                       |                      |
|-----------------------------------------------------------|---------------------|---------------------|-----------------------|-----------------------|---------------------|---------------------|-----------------------|---------------------|-----------------------|----------------------|
|                                                           | H3K4me3             | K_crotonylation     | H3K9me3               | H3K27me3              | H3K9ac              | H3K27ac             | H4K8_hib              | H4ac                | K_acetylation         | 5hMC                 |
| <b>chrX</b>                                               | <b><u>0,023</u></b> | <b><u>0,023</u></b> | <b><u>0,0058</u></b>  | <b><u>0,00068</u></b> | 0,031               | <b><u>0,006</u></b> | <b><u>0,00008</u></b> | <b><u>0,010</u></b> | <b><u>0,00009</u></b> | <b><u>0,0005</u></b> |
| <b>chrY</b>                                               | 0,031               | 0,047               | <b><u>0,0170</u></b>  | <b><u>0,00027</u></b> | <b><u>0,023</u></b> | <b><u>0,079</u></b> | <b><u>0,00011</u></b> | <b><u>0,007</u></b> | <b><u>0,00016</u></b> | <b><u>0,0005</u></b> |
| <b>chr3</b>                                               | 0,026               | 0,034               | 0,0010                | 0,02800               | 0,033               | 0,002               | 0,00056               | 0,025               | 0,00045               | 0,0228               |
| <b>chr6</b>                                               | 0,028               | 0,036               | 0,0004                | 0,02949               | 0,035               | 0,003               | 0,00072               | 0,028               | 0,00057               | 0,0324               |
| <b>chr14</b>                                              | 0,040               | 0,046               | <b><u>0,0078</u></b>  | 0,02884               | 0,043               | <b><u>0,006</u></b> | 0,00080               | 0,033               | 0,00039               | 0,0278               |
| <b>chr16</b>                                              | 0,031               | 0,042               | 0,0009                | 0,03061               | 0,039               | 0,003               | 0,00079               | 0,031               | 0,00066               | 0,0325               |
| <b>chr18</b>                                              | 0,029               | 0,037               | 0,0004                | 0,03299               | 0,035               | 0,002               | 0,00073               | 0,028               | 0,00039               | 0,0324               |
| <b>genome</b>                                             | 0,033               | 0,042               | 0,0023                | 0,032                 | 0,040               | 0,006               | 0,00081               | 0,031               | 0,00057               | 0,0380               |
| <b>All chromosomes</b>                                    |                     |                     |                       |                       |                     |                     |                       |                     |                       |                      |
| <b>mean</b>                                               | 0,034               | 0,043               | 0,0024                | 0,033                 | 0,040               | 0,007               | 0,0008                | 0,031               | 0,00058               | 0,039                |
| <b>SD</b>                                                 | 0,006               | 0,008               | 0,0039                | 0,012                 | 0,007               | 0,017               | 0,0003                | 0,009               | 0,00022               | 0,018                |
| <b>95% CI max value</b>                                   | <i>0,045</i>        | <i>0,058</i>        | <i>0,0100</i>         | <i>0,057</i>          | <i>0,054</i>        | <i>0,039</i>        | <i>0,0014</i>         | <i>0,049</i>        | <i>0,00102</i>        | <i>0,075</i>         |
| <b>95% CI min value</b>                                   | <i>0,023</i>        | <i>0,028</i>        | <i>-0,0053</i>        | <i>0,009</i>          | <i>0,027</i>        | <i>-0,026</i>       | <i>0,0002</i>         | <i>0,013</i>        | <i>0,00014</i>        | <i>0,003</i>         |
| <b>Autosomes only</b>                                     |                     |                     |                       |                       |                     |                     |                       |                     |                       |                      |
| <b>mean</b>                                               | 0,034               | 0,044               | 0,0014                | 0,036                 | 0,042               | 0,003               | 0,0009                | 0,033               | 0,00063               | 0,043                |
| <b>SD</b>                                                 | 0,005               | 0,007               | 0,0018                | 0,006                 | 0,006               | 0,001               | 0,0002                | 0,005               | 0,00018               | 0,014                |
| <b>95% CI max value</b>                                   | <b><u>0,045</u></b> | <b><u>0,056</u></b> | <b><u>0,0049</u></b>  | <b><u>0,048</u></b>   | <b><u>0,053</u></b> | <b><u>0,005</u></b> | <b><u>0,0013</u></b>  | <b><u>0,044</u></b> | <b><u>0,00097</u></b> | <b><u>0,070</u></b>  |
| <b>95% CI min value</b>                                   | <b><u>0,024</u></b> | <b><u>0,031</u></b> | <b><u>-0,0021</u></b> | <b><u>0,024</u></b>   | <b><u>0,031</u></b> | <b><u>0,001</u></b> | <b><u>0,0005</u></b>  | <b><u>0,023</u></b> | <b><u>0,00028</u></b> | <b><u>0,016</u></b>  |

Additional file 1
