# Supplementary material for: Expression and epigenomic landscape of the sex chromosomes in mouse post-meiotic male germ cells
Source: Springer Nature journal article supplement (doi:10.1186/s13072-016-0099-8), 2016-10-27

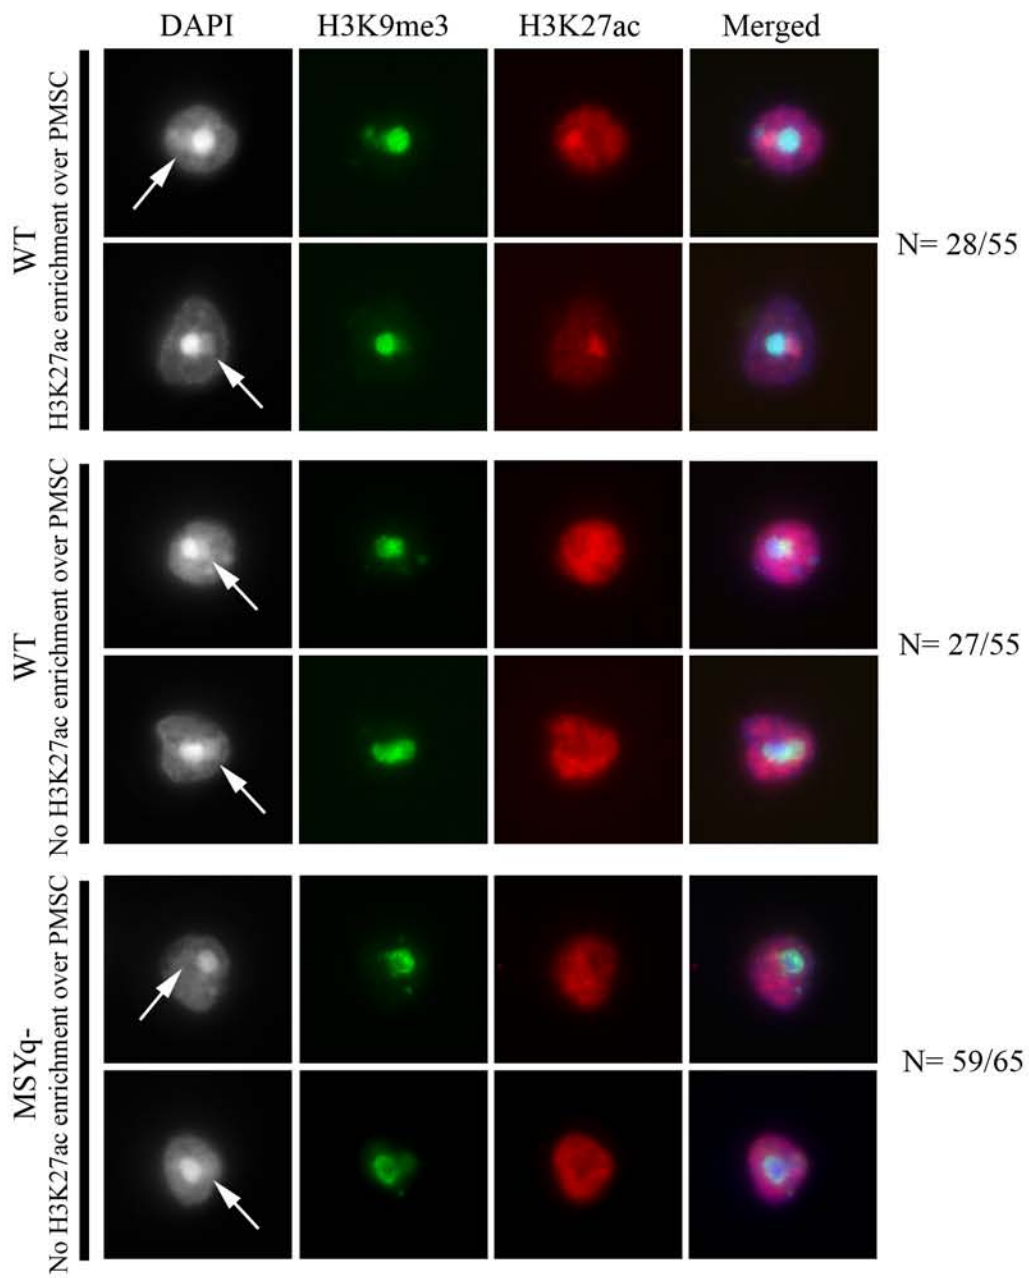

Supplement: MOESM4 [file 13072_2016_99_MOESM4_ESM.pdf]
