# Supplementary material for: Expression and epigenomic landscape of the sex chromosomes in mouse post-meiotic male germ cells
Source: Springer Nature journal article supplement (doi:10.1186/s13072-016-0099-8), 2016-10-27
Supplement: MOESM5 [file 13072_2016_99_MOESM5_ESM.pdf]

**Additional file 5: Analysis of expressed genes for X and Y chromosomes throughout spermatogenesis**

| <b>p value of <math>\chi^2</math> test for X chromosome vs autosomes</b> | <b>Y</b> | <b>3</b> | <b>6</b> | <b>14</b> |
|--------------------------------------------------------------------------|----------|----------|----------|-----------|
| For spermatogonia B cells                                                | 1.83E-88 | 4.67E-01 | 6.06E-03 | 1.74E-03  |
| For pachytene stage cells                                                | 6.69E-76 | 2.13E-06 | 7.89E-07 | 9.74E-02  |
| For round spermatids cells                                               | 3.95E-08 | 7.20E-01 | 2.40E-01 | 4.75E-05  |
| For elongating cells                                                     | 1.59E-04 | 2.86E-01 | 5.02E-01 | 9.58E-04  |

| <b>p value of <math>\chi^2</math> test for X chromosome stages</b> |          |
|--------------------------------------------------------------------|----------|
| For SB vs PS                                                       | 1.65E-03 |
| For PS vs RS                                                       | 1.10E-17 |
| For SB vs RS                                                       | 4.80E-08 |
| For RS vs ES                                                       | 5.64E-02 |

| <b>p value of <math>\chi^2</math> test for Y chromosome vs autosomes</b> | <b>16</b> | <b>18</b> |
|--------------------------------------------------------------------------|-----------|-----------|
| For spermatogonia B cells                                                | 1.29E-87  | 6.02E-86  |
| For pachytene stage cells                                                | 3.02E-90  | 7.03E-87  |
| For round spermatids cells                                               | 1.30E-03  | 8.88E-06  |
| For elongating cells                                                     | 4.14E-02  | 7.43E-03  |

| <b>p value of <math>\chi^2</math> test for Y chromosome stages</b> |           |
|--------------------------------------------------------------------|-----------|
| For SB vs PS                                                       | 3.96E-01  |
| For PS vs RS                                                       | 9.90E-111 |
| For SB vs RS                                                       | 2.49E-106 |
| For RS vs ES                                                       | 7.91E-03  |
