# Supplementary material for: Expression and epigenomic landscape of the sex chromosomes in mouse post-meiotic male germ cells
Source: Springer Nature journal article supplement (doi:10.1186/s13072-016-0099-8), 2016-10-27
Supplement: MOESM6 [file 13072_2016_99_MOESM6_ESM.pdf]

Additional file 6: Mann and Whitney test on the RPKM values of X and Y chromosomes throughout spermatogenesis

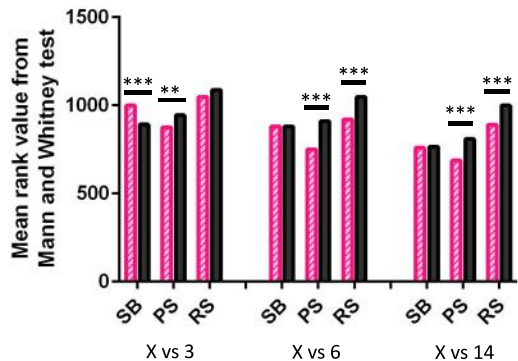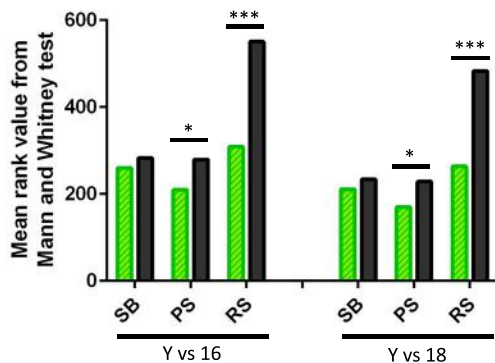

| SB      | p      |
|---------|--------|
| X vs 3  | <.0001 |
| X vs 6  | 0.5    |
| X vs 14 | 0.3974 |

| PS      | p      |
|---------|--------|
| X vs 3  | 0.0032 |
| X vs 6  | <.0001 |
| X vs 14 | <.0001 |

| RS      | p      |
|---------|--------|
| X vs 3  | 0.0643 |
| X vs 6  | <.0001 |
| X vs 14 | <.0001 |

| SB      | p      |
|---------|--------|
| 16 vs Y | 0.2297 |
| 18 vs Y | 0.1841 |

| PS      | p      |
|---------|--------|
| 16 vs Y | 0.0188 |
| 18 vs Y | 0.0162 |

| RS      | p      |
|---------|--------|
| 16 vs Y | <.0001 |
| 18 vs Y | <.0001 |
