# Supplementary material for: Expression and epigenomic landscape of the sex chromosomes in mouse post-meiotic male germ cells
Source: Springer Nature journal article supplement (doi:10.1186/s13072-016-0099-8), 2016-10-27
Supplement: MOESM7 [file 13072_2016_99_MOESM7_ESM.pdf]

**Additional file 7:**  $\chi^2$  test on the number of PS repressed genes and PS repressed genes that are not reactivated in RS for X and Y chromosomes

| <b>p value of <math>\chi^2</math> test for X chromosomes vs autosomes</b>   | <b>Y</b> | <b>3</b> | <b>6</b> | <b>14</b> |
|-----------------------------------------------------------------------------|----------|----------|----------|-----------|
| <b>For the proportion of pachytene repressed genes</b>                      | 7.62E-02 | 1.22E-50 | 2.25E-46 | 2.15E-33  |
| <b>For the proportion PS repressed genes that are not reactivated in RS</b> | 4.20E-01 | 5.64E-01 | 5.83E-02 | 6.55E-09  |

  

| <b>p value of <math>\chi^2</math> test for Y chromosomes vs autosomes...</b> | <b>16</b> | <b>18</b> |
|------------------------------------------------------------------------------|-----------|-----------|
| <b>For the proportion of pachytene repressed genes</b>                       | 2.24E-07  | 1.20E-06  |
| <b>For the proportion PS repressed genes that are not reactivated in RS</b>  | 7.46E-02  | 2.58E-01  |
