# Supplementary material for: Expression and epigenomic landscape of the sex chromosomes in mouse post-meiotic male germ cells
Source: Springer Nature journal article supplement (doi:10.1186/s13072-016-0099-8), 2016-10-27
Supplement: MOESM8 [file 13072_2016_99_MOESM8_ESM.pdf]

**Additional file 8:**  $\chi^2$  test on the number of genes enriched in RS and RS specific genes for X and Y chromosomes and chromosome 14

| <b>p value of <math>\chi^2</math> test for X chromosome vs autosomes</b> | <b>Y</b>  | <b>3</b> | <b>6</b> | <b>14</b> |
|--------------------------------------------------------------------------|-----------|----------|----------|-----------|
| For the proportion of genes enriched in RS                               | 6.89E-75  | 2.15E-03 | 2.24E-02 | 2.20E-03  |
| For the proportion of RS specific genes                                  | 3.91E-118 | 6.26E-06 | 4.12E-08 | 7.28E-01  |

  

| <b>p value of <math>\chi^2</math> test for Y chromosome vs autosomes</b> | <b>16</b> | <b>18</b> |
|--------------------------------------------------------------------------|-----------|-----------|
| For the proportion of genes enriched in RS                               | 7.40E-78  | 9.09E-75  |
| For the proportion of RS specific genes                                  | 1.00E-124 | 5.76E-119 |

  

| <b>p value of <math>\chi^2</math> test for chromosome 14</b> | <b>10</b> |
|--------------------------------------------------------------|-----------|
| For the proportion of genes enriched in RS                   | 1.94E-12  |
| For the proportion of RS specific genes                      | 1.02E-12  |
