# Supplementary material for: Expression and epigenomic landscape of the sex chromosomes in mouse post-meiotic male germ cells
Source: Springer Nature journal article supplement (doi:10.1186/s13072-016-0099-8), 2016-10-27
Supplement: MOESM9 [file 13072_2016_99_MOESM9_ESM.pdf]

Additional file 9: Analysis of single copy genes and collapsed multicopy gene family of the sex chromosomes.

| a. X-linked genes                                                        | Single copy genes        | Multicopy gene family        | % of expressed genes        |
|--------------------------------------------------------------------------|--------------------------|------------------------------|-----------------------------|
| <i>Expressed at some point during spermatogenesis</i>                    | 1140                     | 50                           | 49,17                       |
| Expressed in spermatogonia B cells                                       | 806                      | 32                           | 70,42                       |
| Expressed in pachytene stage cells                                       | 726                      | 35                           | 63,95                       |
| Expressed in round spermatids cells                                      | 855                      | 48                           | 75,88                       |
| Enriched in RS                                                           | 308                      | 48                           | 29,92                       |
| RS specific                                                              | 176                      | 21                           | 16,55                       |
| <b>p value of <math>\chi^2</math> test for X chromosome vs autosomes</b> | <b>3</b>                 | <b>6</b>                     |                             |
| For spermatogonia B cells                                                | 3,83E-01                 | 2,42E-01                     |                             |
| For pachytene stage cells                                                | 6,16E-04                 | 2,28E-04                     |                             |
| For round spermatids cells                                               | 2,78E-01                 | 6,44E-02                     |                             |
| For genes enriched in RS                                                 | 7,11E-03                 | 5,19E-02                     |                             |
| For RS specific genes                                                    | 4,07E-03                 | 8,40E-05                     |                             |
| <b>b. Y-linked genes</b>                                                 | <b>Single copy genes</b> | <b>Multicopy gene family</b> | <b>% of expressed genes</b> |
| <i>Expressed at some point during spermatogenesis</i>                    | 12                       | 4                            | 94,12                       |
| Expressed in spermatogonia B cells                                       | 8                        | 1                            | 56,25                       |
| Expressed in pachytene stage cells                                       | 8                        | 1                            | 56,25                       |
| Expressed in round spermatids cells                                      | 10                       | 4                            | 87,50                       |
| Enriched in RS                                                           | 3                        | 3                            | 37,50                       |
| RS specific                                                              | 3                        | 3                            | 37,50                       |
| <b>p value of <math>\chi^2</math> test for Y chromosome vs autosomes</b> | <b>3</b>                 | <b>6</b>                     |                             |
| For spermatogonia B cells                                                | 1,58E-01                 | 1,05E-01                     |                             |
| For pachytene stage cells                                                | 1,79E-01                 | 1,40E-01                     |                             |
| For round spermatids cells                                               | 6,27E-01                 | 4,14E-01                     |                             |
| For genes enriched in RS                                                 | 2,37E-01                 | 1,81E-01                     |                             |
| For RS specific genes                                                    | 8,22E-04                 | 6,86E-05                     |                             |
| <b>c. Y-linked genes multicopy gene family</b>                           | <b>RPKM mean in RS</b>   | <b>RPKM sum in RS</b>        |                             |
| <i>Sly</i> (32 out of 126 copies)                                        | 1,16                     | 37,09                        |                             |
| <i>Ssty1/2</i> (28 out of 306 copies)                                    | 0,92                     | 25,91                        |                             |
| <i>Rbmy</i> (9 out of 30 copies)                                         | 3,32                     | 29,92                        |                             |
| <i>Srsy</i> (zero out of 197 copies)                                     |                          |                              |                             |
