# Supplementary material for: Expression and epigenomic landscape of the sex chromosomes in mouse post-meiotic male germ cells
Source: Springer Nature journal article supplement (doi:10.1186/s13072-016-0099-8), 2016-10-27
Supplement: MOESM10 [file 13072_2016_99_MOESM10_ESM.pdf]

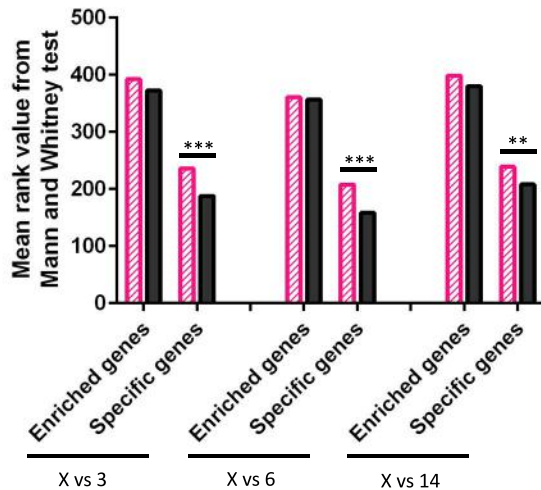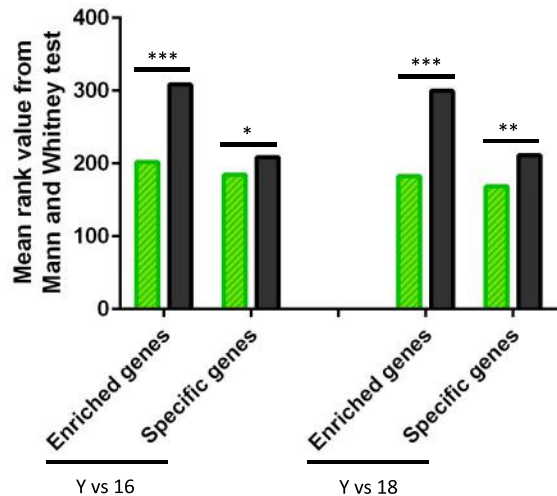

| Enriched in RS | p      |
|----------------|--------|
| X vs 3         | 0.1131 |
| X vs 6         | 0.4052 |
| X vs 14        | 0.1271 |

| Enriched in RS | p      |
|----------------|--------|
| Y vs 16        | <.0001 |
| Y vs 18        | <.0001 |

| RS specific | p      |
|-------------|--------|
| X vs 3      | <.0001 |
| X vs 6      | <.0001 |
| X vs 14     | 0.0059 |

| RS specific | p      |
|-------------|--------|
| Y vs 16     | 0.0401 |
| Y vs 18     | 0.0028 |
