# Supplementary material for: Expression and epigenomic landscape of the sex chromosomes in mouse post-meiotic male germ cells
Source: Springer Nature journal article supplement (doi:10.1186/s13072-016-0099-8), 2016-10-27
Supplement: MOESM11 [file 13072_2016_99_MOESM11_ESM.pdf]

**Additional file 11: List of the round spermatid specific genes of the chromosome 14**

|               |               |               |               |               |
|---------------|---------------|---------------|---------------|---------------|
| Gm2888        | Gm8024        | Gm3072        | Gm25517       | Gm9780        |
| Gm10340       | Gm17124       | Gm3676        | 4930444M15Rik | SImapos2      |
| Gm5795        | Gm5929        | Gm8065        | 1700108F19Rik | mmu-mir-6947  |
| Gm10413       | Gm3008        | Gm8068        | Zfp957        | 1700087M22Rik |
| Gm3012        | Gm10377       | Gm7929        | Gm25115       | Colq          |
| Gm3002        | Gm21977       | Gm7980        | Cdhr1         | Slc18a3       |
| Gm3095        | Gm10376       | Gm6401        | 1700120O09Rik | 3425401B19Rik |
| Gm3099        | Gm8094        | Gm3543        | 4930596D02Rik | 1810011H11Rik |
| Gm8108        | Gm8122        | Gm2930        | Gm7853        | Fam170b       |
| Gm3127        | Gm8127        | Gm7991        | 4930474N05Rik | Gm26228       |
| Gm3138        | 1700001F09Rik | 1700091H14Rik | Pnma2         | Gm5460        |
| Gm3159        | Gm8138        | Gm7951        | 4930578I07Rik | Gm7945        |
| Gm3182        | Gm17654       | Gm17027       | Gm27647       | Gm6482        |
| Gm3030        | Gm10375       | Gm3573        | Antxrl        | Gm7954        |
| Gm8159        | Gm8046        | Gm17026       | A630023A22Rik | Gm3486        |
| Gm7876        | Gm8165        | Gm9611        | Gm17116       | Gm7970        |
| Gm9602        | Gm16506       | Gm8005        | Chrna2        | 4930438E09Rik |
| Gm3269        | Gm8180        | Gm8020        | Gm37034       | Gm10860       |
| Gm3264        | Ear-ps8       | Pcdh9         | Gzmd          | Gm31748       |
| Gm3278        | Gm16545       | 4921530L21Rik | Gzmg          | Gm16549       |
| Gm3298        | Gm3327        | Gm15515       | Gzmn          | 4930564B18Rik |
| 4930555G01Rik | Gm8212        | 4930517O19Rik | Gjb6          | Gm3715        |
| Gm3339        | Gm8220        | Slain1os      | 4930563I02Rik | Gm3727        |
| Gm3542        | Gm8229        | 4930449E01Rik | Amer2         | Gm3752        |
| Gm8246        | Gm8232        | Mir6390       | Arl11         | Gm3558        |
| Gm3187        | BC061237      | 1700128A07Rik | 1700109G14Rik | Dnase1l3      |
| Gm9603        | Gm8247        | Slitrk1       | Gm27928       | Fhitos        |
| Gm3424        | Gm8256        | 4930505G20Rik | Blk           | Gm3848        |
| Gm17158       | Gm21754       | Gm26791       | Gm21430       | Gm8582        |
| Gm3242        | Gm16976       | 1700044C05Rik | 4930578I06Rik | Gm9637        |
| Gm8206        | Gm10101       | Gm27198       | Prss55        | Dusp13        |
| Gm26991       | 1700011H14Rik | 1700006F04Rik | Prss51        | Gm17175       |
| Gm21560       | Olf731        | Hs6st3        | 4930471C04Rik | Gm17174       |
| Gm16440       | Olf732        | Gm17613       | Prss52        | Gm17078       |
| Gm3594        | Olf733        | Zic5          | E330034G19Rik | Gm4181        |
| Gm8356        | Gm21718       | 2610528A11Rik | 4930542C16Rik | Gm17079       |
| Gm3642        | Gm3719        | Nrg3os        | 4931403M11Rik | Gm5800        |
| Gm6356        | Vmn2r88       | Gm20642       | 4930428N03Rik | AY358078      |
| Gm6676        | Vmn2r-ps111   | 1700109I08Rik | 1700054O19Rik | Olf1508       |
| Gm16434       | Gm7247        | Sh2d4b        | Anxa11os      | Olf1507       |
|               |               |               |               | Mhrt          |
