# Supplementary material for: Expression and epigenomic landscape of the sex chromosomes in mouse post-meiotic male germ cells
Source: Springer Nature journal article supplement (doi:10.1186/s13072-016-0099-8), 2016-10-27
Supplement: MOESM12 [file 13072_2016_99_MOESM12_ESM.pdf]

## Additional file 12 - 1/2

### RNA-Seq analyses

datasets from [47]

Mapping with STAR 2.4.2a [75] on Mouse Genome version GRCm38 mm10.

Command line:

```
STAR --outSAMstrandField intronMotif --outFilterMismatchNmax 2 --outFilterMultimapNmax 10 --genomeDir $Starindex --readFilesIn $File1 --runThreadN $threads --outSAMunmapped Within --outSAMtype BAM SortedByCoordinate --outStd BAM_SortedByCoordinate --genomeLoad NoSharedMemory --chimSegmentMin 15 --limitBAMsortRAM $starlimitRAM
```

FPKM count using FeatureCounts (Subread package version 1.4.6-p5) [76]

Command line:

```
featureCounts -a Mus_musculus.GRCm38.81.gtf -o counts.txt -A chrnames.txt -t exon -g gene_id --primary -T 30 GSM860181.bam GSM860182.bam GSM860183.bam GSM860184.bam GSM860185.bam GSM860186.bam GSM860187.bam GSM860188.bam
```

| Sample    | cell type | Number of reads | Uniquely mapped reads number | Number of reads mapped to multiple loci | Number of reads mapped to too many loci | % of unmapped reads | % of mapped reads |
|-----------|-----------|-----------------|------------------------------|-----------------------------------------|-----------------------------------------|---------------------|-------------------|
| GSM860181 | priSG-A   | 46 531 667      | 36 259 756                   | 4 731 871                               | 217 517                                 | 0,5%                | 99,5%             |
| GSM860182 | SG-A      | 40 616 823      | 32 616 138                   | 3 698 384                               | 176 306                                 | 0,4%                | 99,6%             |
| GSM860183 | SG-B      | 30 856 488      | 24 464 384                   | 2 801 768                               | 125 578                                 | 0,4%                | 99,6%             |
| GSM860184 | lepSC     | 39 869 596      | 31 960 883                   | 3 334 547                               | 144 071                                 | 0,4%                | 99,6%             |
| GSM860185 | pacSC     | 32 436 551      | 26 541 732                   | 2 453 985                               | 84 493                                  | 0,3%                | 99,7%             |
| GSM860186 | rST       | 38 101 736      | 31 668 437                   | 2 022 790                               | 101 116                                 | 0,3%                | 99,7%             |
| GSM860187 | eST       | 30 363 718      | 25 706 211                   | 1 562 476                               | 63 762                                  | 0,2%                | 99,8%             |
| GSM860188 | SE        | 36 991 035      | 30 380 459                   | 3 444 961                               | 158 240                                 | 0,4%                | 99,6%             |

## Additional file 12 - 2/2

### ChIP-Seq analyses

Mapping with Heng Li Burros-Wheeler aligner BWA [72] version 0.7.5a-r405 with "mem" command against Mouse Genome version GRCh38 mm10

Command line: `bwa mem -t 6 ref_mouse.fa sample.fastq`

Peak calling using MACS [73] v1.4

Command line: `macs14 -t chip_sample.bam -c input_sample.bam -f BAM -g mm -n MACS_sample_mem`

| Sample ID (NCBI)         | Mark                     | Number of reads    | Number of peaks | % of mapped reads | Reference |
|--------------------------|--------------------------|--------------------|-----------------|-------------------|-----------|
| GSM1046840-GSM1046841    | H3K4me3 (duplicate)      | 40783145-225974316 | 32058-40767     | 78,92-89,84%      | [71]      |
| GSM1046842-GSM1046843    | H3K27me3 (duplicate)     | 33620246-225140169 | 30472-38805     | 83,11%-93,42%     | [71]      |
| GSM810678                | K_crotonylation          | 133 523 062        | 40 211          | 80,67%            | [39]      |
| GSM810677                | K_acetylation            | 51 481 906         | 7 099           | 84,08%            | [39]      |
| GSM810676                | Corresponding Input file | 43 928 317         | N/A             | 82,34%            | [39]      |
| Courtesy of S. Rousseaux | H4K8_hib                 | 26 649 536         | 14 908          | 91,70%            | [41]      |
| Courtesy of S. Rousseaux | Corresponding Input file | 31 177 064         | N/A             | 95,25%            | [41]      |
| GSM1519003               | H3K9me3                  | 84 339 867         | 11 659          | 90,34%            | [57]      |
| GSM1519004               | H3K9ac                   | 67 856 707         | 47 333          | 92,04%            | [57]      |
| GSM1519009               | H4ac                     | 70 049 830         | 44 966          | 93,37%            | [57]      |
| GSM1519010               | Corresponding Input file | 54 990 464         | N/A             | 94,38%            | [57]      |
| SRR948811/GSM1202715     | H3K27ac                  | 245 489 610        | 123 434         | 64,51%            | [70]      |
| SRR948814/GSM1202718     | 5hMC                     | 52 517 270         | 125 719         | 96,79%            | [70]      |
| SRR948825/GSM1202725     | Corresponding Input file | 153 674 411        | N/A             | 81,15%            | [70]      |
