# Supplementary material for: Expression and epigenomic landscape of the sex chromosomes in mouse post-meiotic male germ cells
Source: Springer Nature journal article supplement (doi:10.1186/s13072-016-0099-8), 2016-10-27

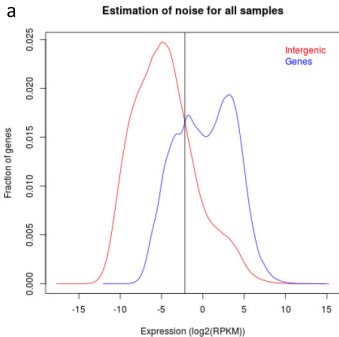

TRESHOLD:  
 $\log_2(\text{RPKM})$ : -2,18  
 RPKM: 0,22

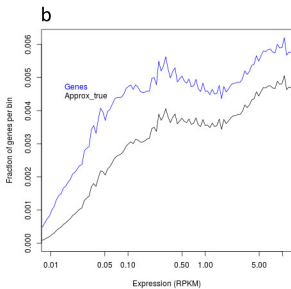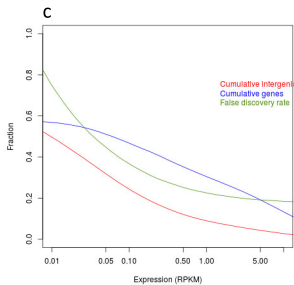

Supplement: MOESM13 [file 13072_2016_99_MOESM13_ESM.pdf]
